# Supplementary material for: Hyperbranched polyethylene-supported l-proline: a highly selective and recyclable organocatalyst for asymmetric aldol reactions
Source: Royal Society of Chemistry journal article supplement (doi:10.1039/c5cy00250h), 2015-01-01
Supplement: c5cy00250h1.pdf [file c5cy00250h1.pdf]

**Hyperbranched Polyethylene-Supported L-Proline: A Highly Selective and Recyclable  
Organocatalyst for Asymmetric Aldol Reactions**

Song Wang,<sup>a</sup> Pingwei Liu,<sup>a</sup> Wen-Jun Wang,<sup>\*,a,b</sup> Zhiguo Zhang,<sup>b</sup> and Bo-Geng Li<sup>a</sup>

<sup>a</sup> State Key Lab of Chemical Engineering, College of Chemical and Biological Engineering,  
Zhejiang University, Hangzhou, China, 310027

<sup>b</sup> Key Lab of Biomass Chemical Engineering of Ministry of Education, College of Chemical and  
Biological Engineering, Zhejiang University, Hangzhou, China, 310027

Fax: (+86)-571-87952772; e-mail: wenjunwang@zju.edu.cn (W.-J. Wang)

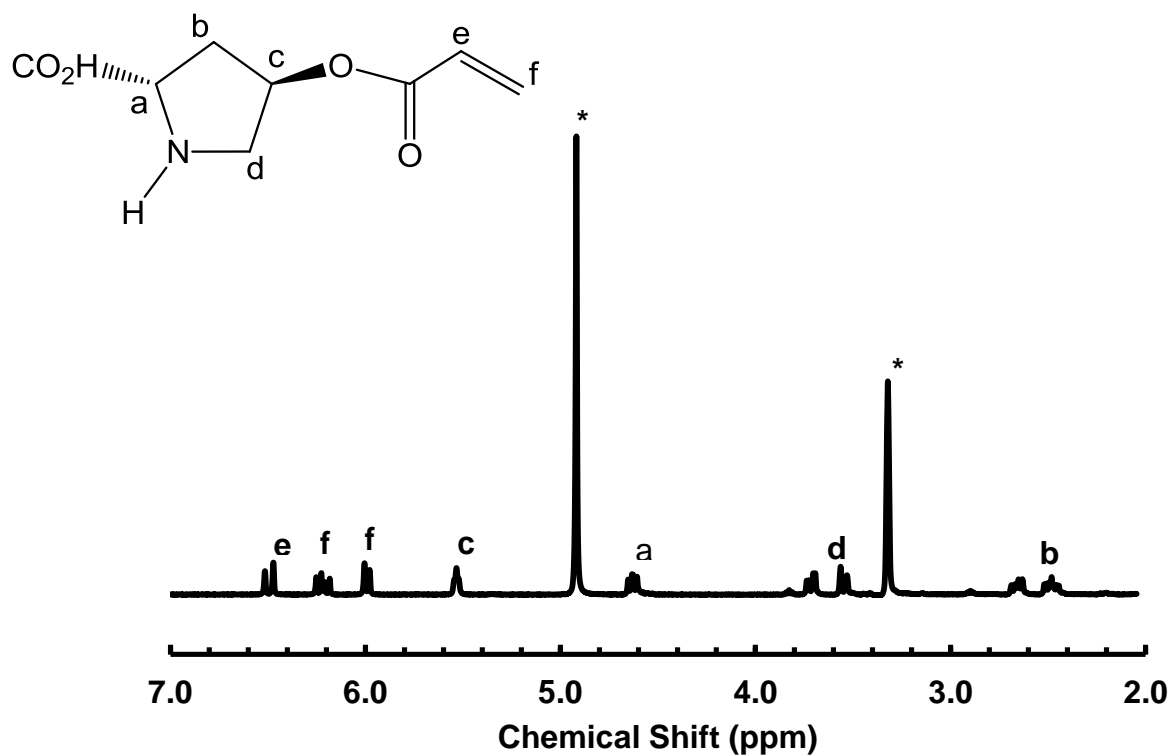

**Figure S1**  $^1\text{H}$  NMR (400 MHz,  $\text{CD}_3\text{OD}$ ) spectrum of O-acryloyl-trans-4-hydroxy-L-proline hydrochloride (**2**):  $\delta = 2.44\text{-}2.68$  ppm (m, 2H, b),  $3.52\text{-}3.73$  ppm (m, 2H, d),  $4.60\text{-}4.64$  (m, 1H, a),  $5.52$  (br s, 1H, c),  $5.96\text{-}5.99$  (m, 1H, f),  $6.17/6.20/6.21/6.24$  (s, 1H, f),  $6.46/6.50$  (s, 1H, e), \* represents the peak of the solvent.

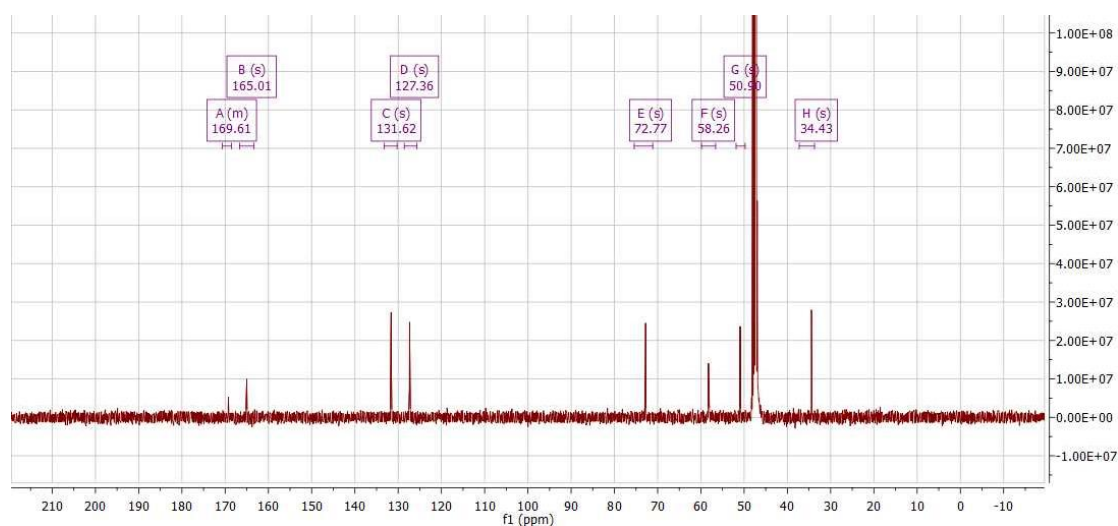

**Figure S2**  $^{13}\text{C}$  NMR (100 MHz,  $\text{CD}_3\text{OD}$ ) spectrum of O-acryloyl-trans-4-hydroxy-L-proline hydrochloride (**2**)

ESI-MS: calculated for  $\text{C}_8\text{H}_{13}\text{NO}_4^+$  [ $M+\text{H}^+$ ]: 186.1, found: 185.9.

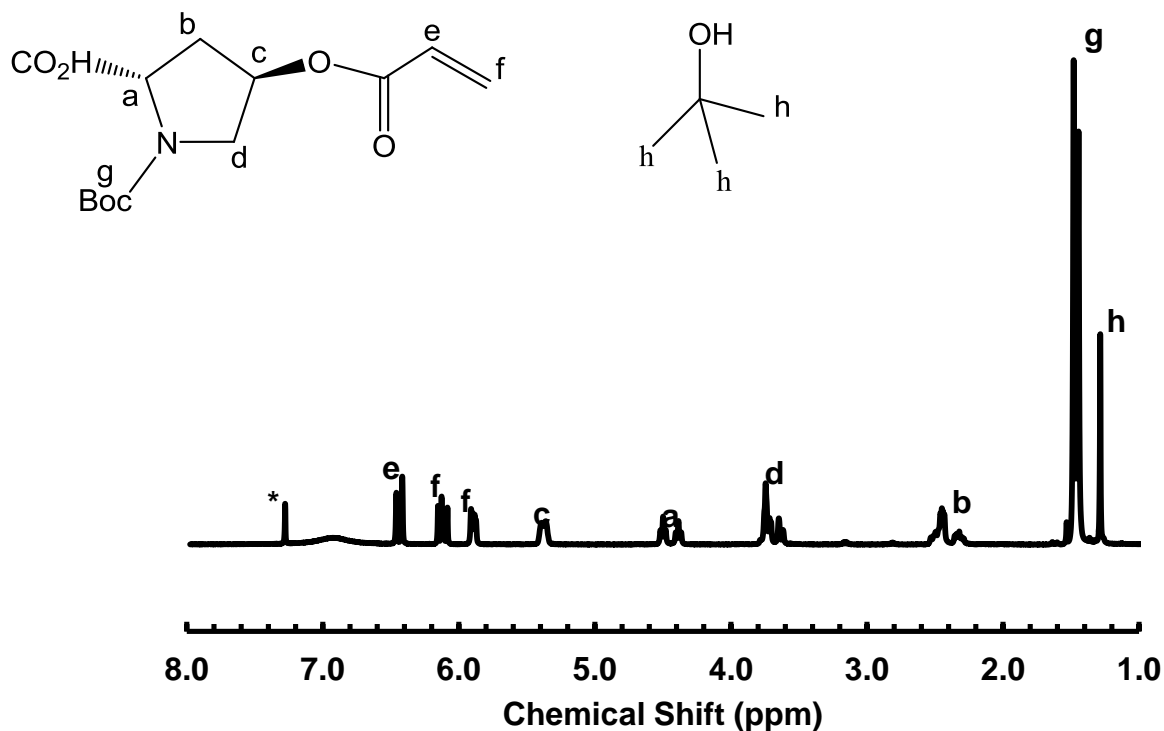

**Figure S3**  $^1\text{H}$  NMR (400 MHz,  $\text{CDCl}_3$ ) spectrum of N-tert-butyloxycarbonyl- O-acryloyl-trans-4-hydroxy-L-proline (**3**):  $\delta = 1.43/1.46$  (s, 9H, h), 2.27-2.51 (m, 2H, b), 3.60-3.73 (m, 2H, d), 4.37/4.48 (t, 1H, a), 5.35 (br s, 1H, c), 5.86-5.89 (m, 1H, f), 6.07/6.09/6.11/6.14 (s, 1H, f), 6.40/6.44 (s, 1H, e), \* represents the peak of the solvent.

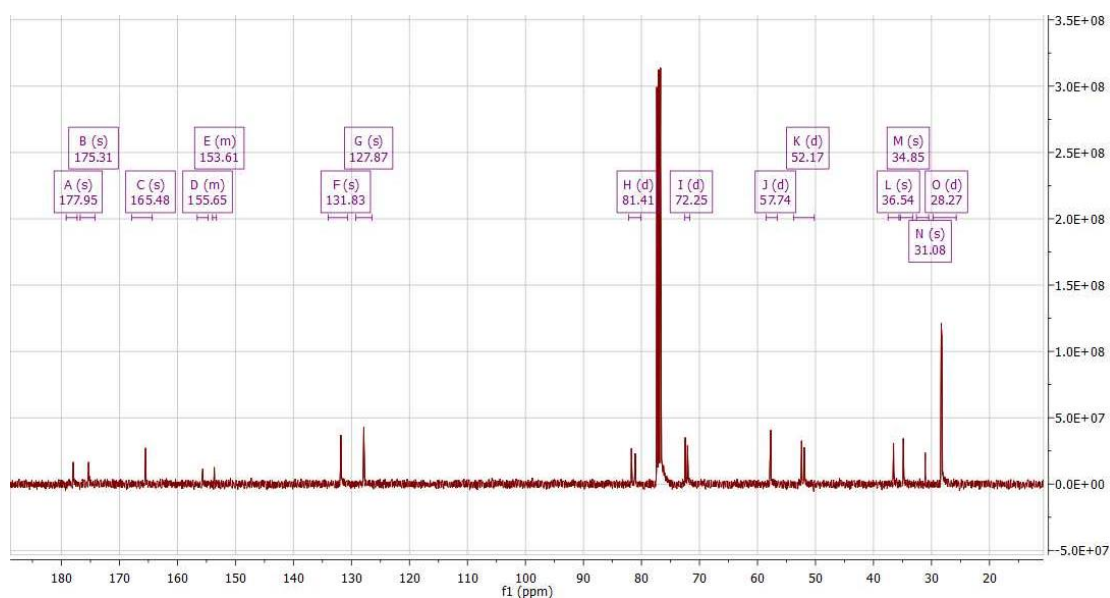

**Figure S4**  $^{13}\text{C}$  NMR (100 MHz,  $\text{CDCl}_3$ ) spectrum of N-tert-butyloxycarbonyl- O-acryloyl-trans-4-hydroxy-L-proline (**3**) and tertiary butanol.

ESI-MS: calculated for  $\text{C}_{13}\text{H}_{20}\text{NO}_6$  [ $M+\text{H}^+$ ]: 286.1, found: 285.9.

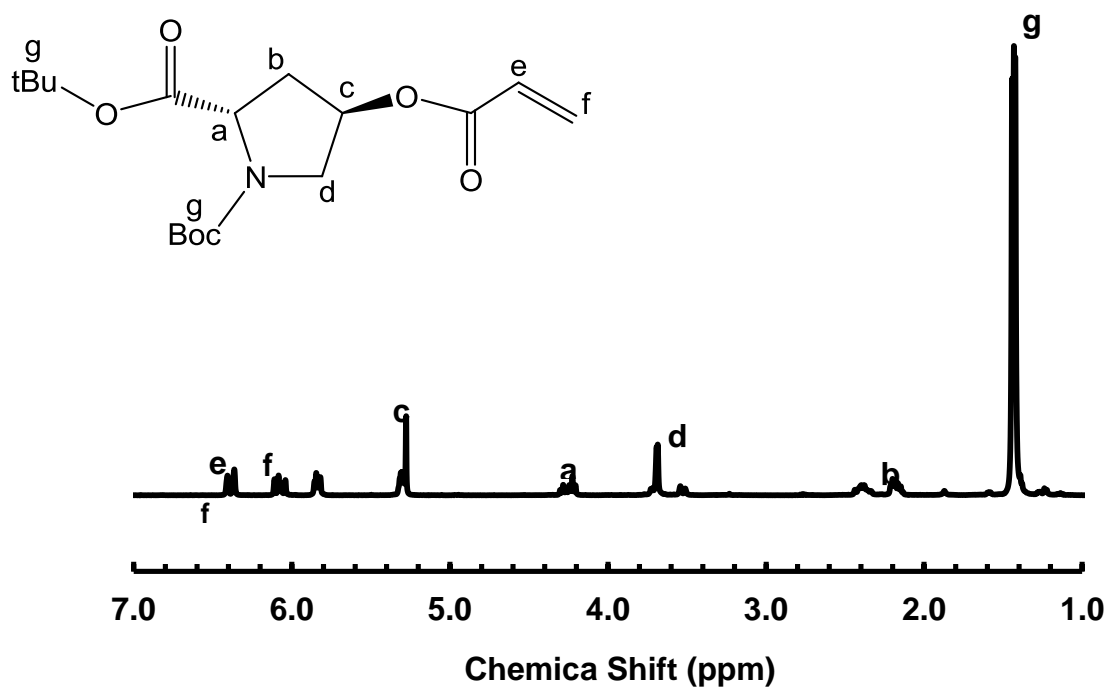

**Figure S5**  $^1\text{H}$  NMR (400 MHz,  $\text{CDCl}_3$ ) spectrum of tert-butyl-N-tert-Butylloxycarbonyl-O-acryloyl-trans-4-hydroxy-L-proline ester (**4**):  $\delta = 1.43$  (t, 18H, g), 2.13-2.44 (m, 2H, b), 3.51-3.73 (m, 2H, d), 4.20-4.30 (m, 1H, a), 5.31 (br s, 1H, c), 5.82-5.86 (m, 1H, f), 6.04/6.07/6.08/6.11 (s, 1H, f), 6.36/6.41 (s, 1H, e).

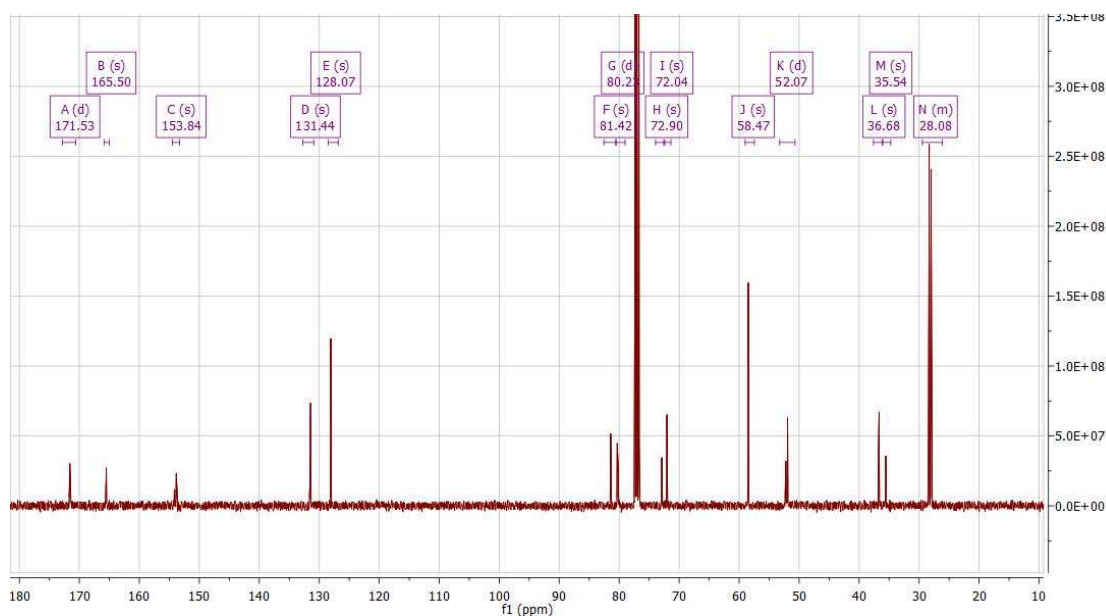

**Figure S6**  $^{13}\text{C}$  NMR (100 MHz,  $\text{CDCl}_3$ ) spectrum of tert-butyl-N-tert-Butylloxycarbonyl-O-acryloyl-trans-4-hydroxy-L-proline ester (**4**)

ESI-MS: calculated for  $\text{C}_{17}\text{H}_{28}\text{NO}_6$  [ $M+\text{H}^+$ ]: 342.2, found: 342.0.

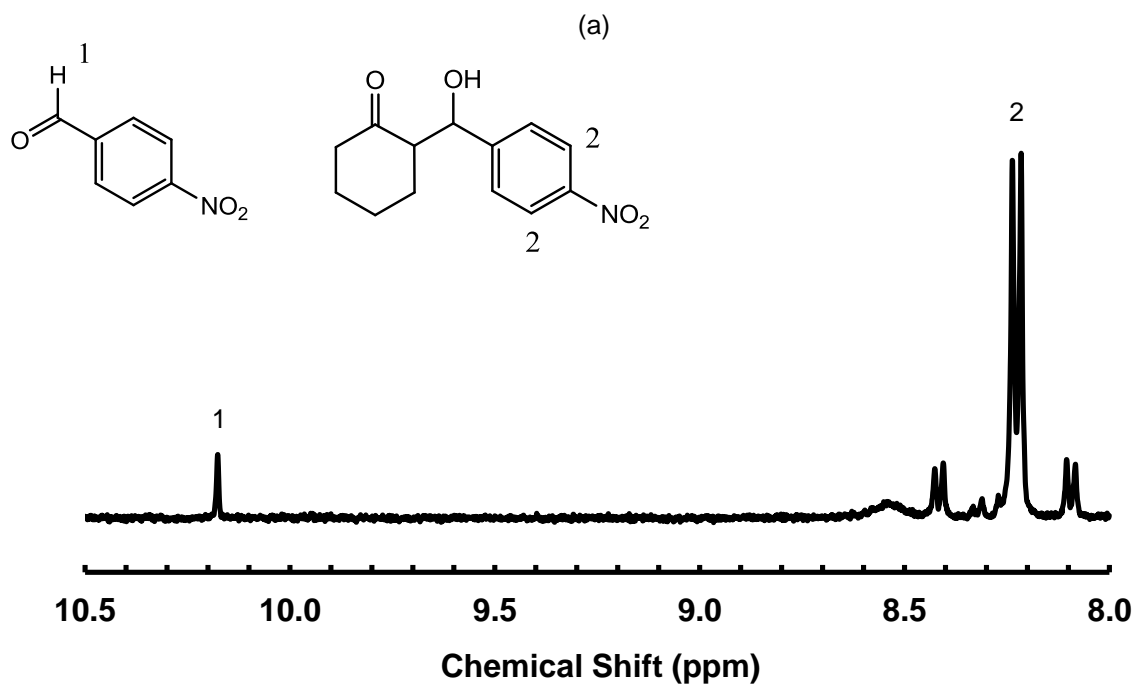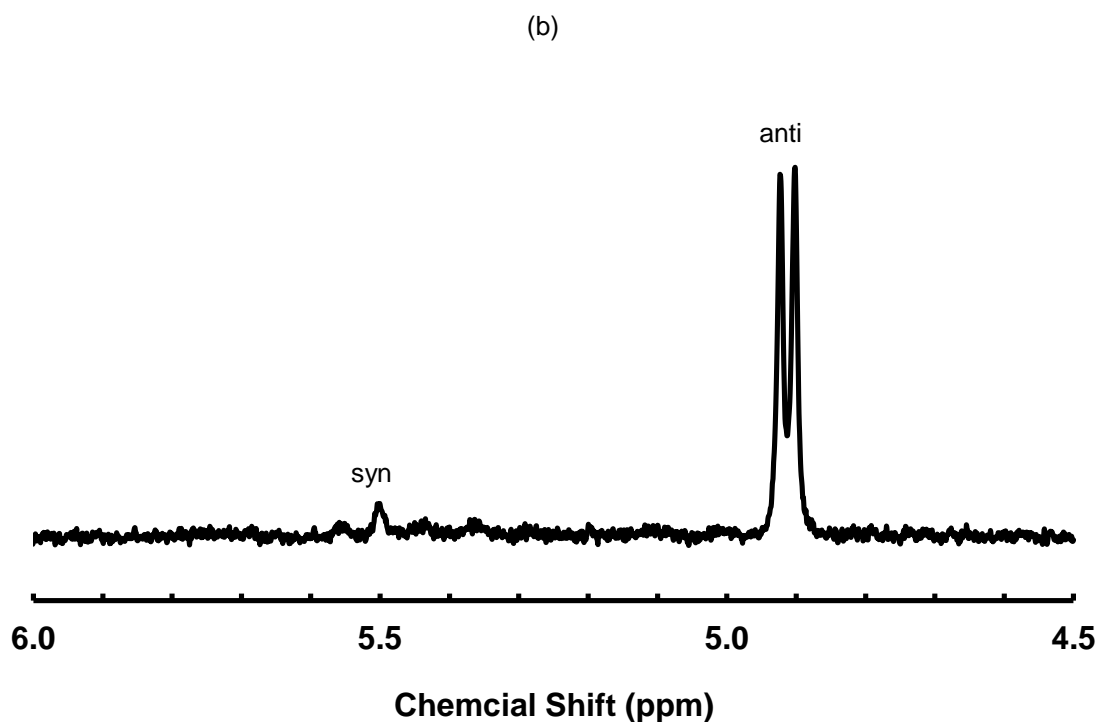

**Figure S7**  $^1\text{H}$  NMR (400 MHz,  $\text{CDCl}_3$ ) data of the products from the aldol reaction of cyclohexanone and p-nitrobenzaldehyde (p-NBA) in Run 9 with de-protected P3 (DP3) as catalyst, DP3 (60 mg, 0.03 mmol L-proline), p-NBA (0.1 mmol, 15 mg) cyclohexanone (0.5 mmol, 47 mg), and THF (0.5 mL, containing 5.4  $\mu\text{L}$  water). Figure S7 (a) was used to calculate the conversion of p-NBA (conversion of p-NBA =  $\frac{1}{2}S_2/(S_1 + \frac{1}{2}S_2)$ ,  $S_1$  and  $S_2$  are integral area of peak 1 and 2, respectively; Figure S7 (b) was used to calculate the anti/syn value of the product mixture.

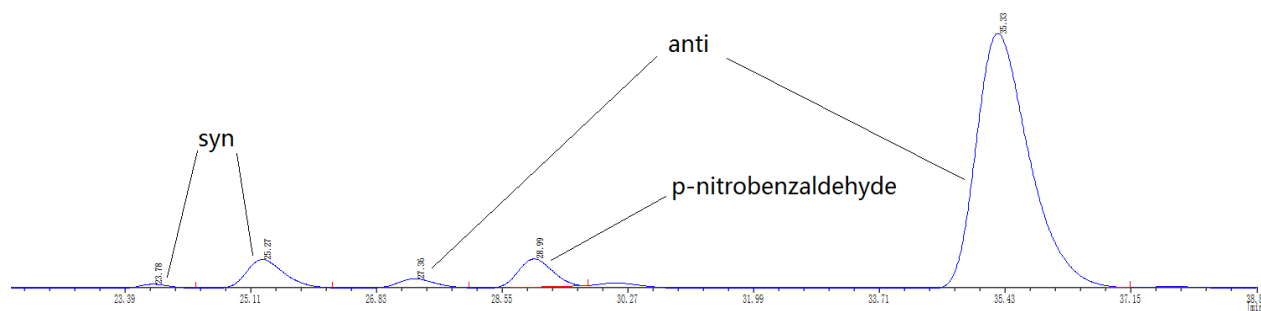

**Figure S8** Chiral HPLC results of the products from the aldol reaction of p-NBA and cyclohexanone in Run 9 with DP3 as catalyst. The value of ee was calculated based on the integrations of the two peaks from the anti-products.

**Table S1** Determination of element contents in run P3 sample

| Element                         | N (%) | C (%) | H (%) |
|---------------------------------|-------|-------|-------|
| Element analysis <sup>a</sup>   | 0.87  | 81.39 | 13.42 |
| <sup>1</sup> H NMR <sup>b</sup> | 0.66  | 81.45 | 13.34 |

<sup>a</sup> determined by an elemental analyzer; <sup>b</sup> estimated from <sup>1</sup>H NMR spectrum using the following equations:  $C(\%) = \frac{2 \times 100 + 17 \times F_4}{mw_E \times 100 + mw_4 \times F_4} \times a_{rC} \times 100$ ;  $H(\%) = \frac{4 \times 100 + 27 \times F_4}{mw_E \times 100 + mw_4 \times F_4} \times a_{rH} \times 100$ ; and

$N(\%) = \frac{F_4}{mw_E \times 100 + mw_4 \times F_4} \times a_{rN} \times 100$ , where  $F_4$  (mol%) is mole ratio of incorporated comonomer **4** in run P3 sample;  $mw_E$  and  $mw_4$  are molecular weights of ethylene and comonomer **4**, respectively; and  $a_{rC}$ ,  $a_{rH}$ , and  $a_{rN}$  are atomic weights for carbon, hydrogen, and nitrogen, respectively.

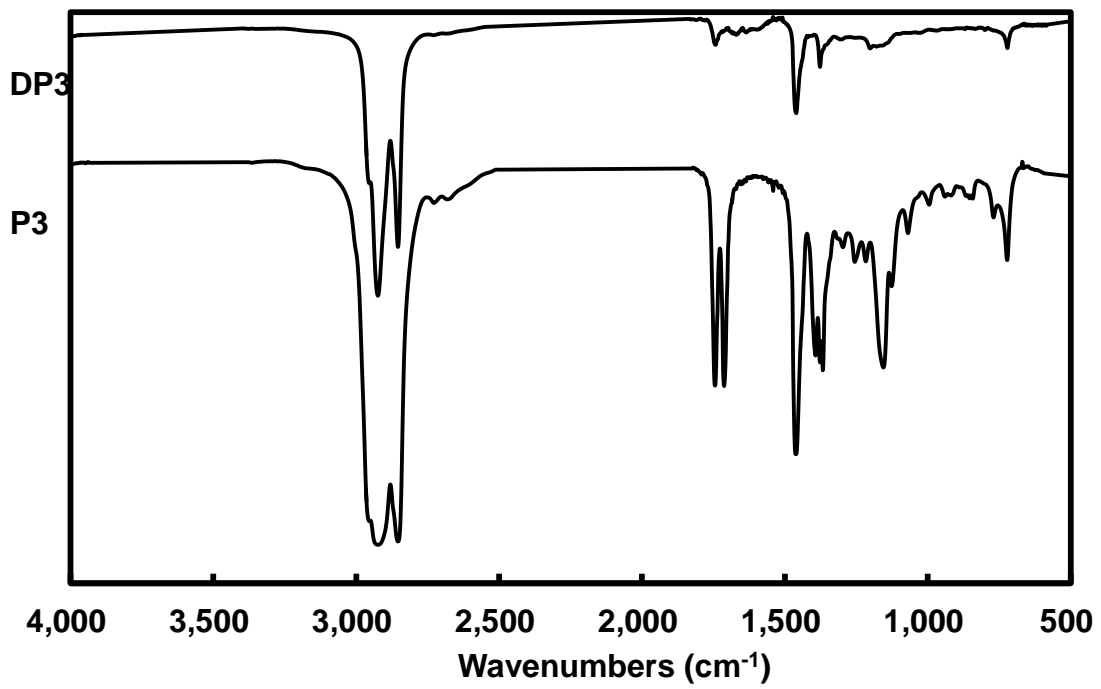

**Figure S9** IR spectra of run P3 sample before and after de-protection treatment (DP3)



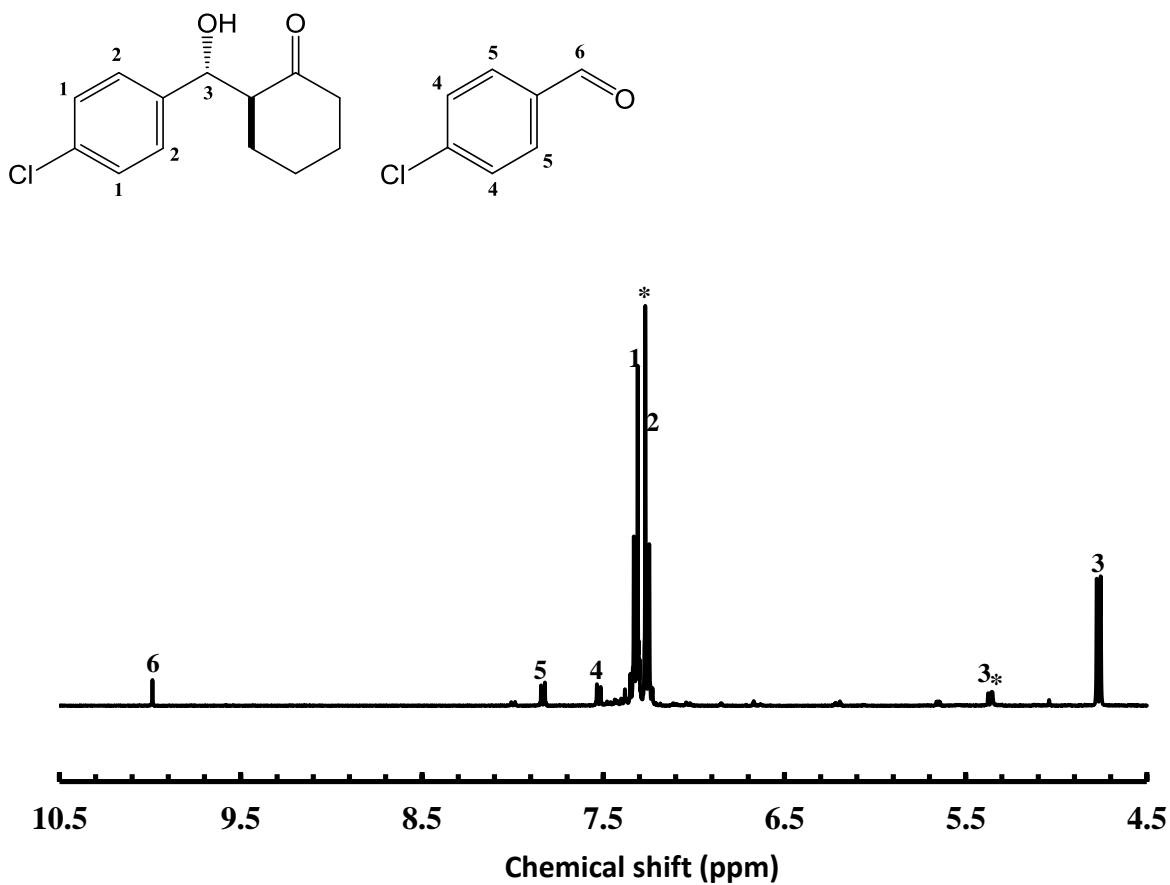

**Figure S10** <sup>1</sup>H NMR (400 MHz, CDCl<sub>3</sub>) data of the products from the Aldol reaction in Run 16 (Table 4) with de-protected P4 (DP4) as catalyst

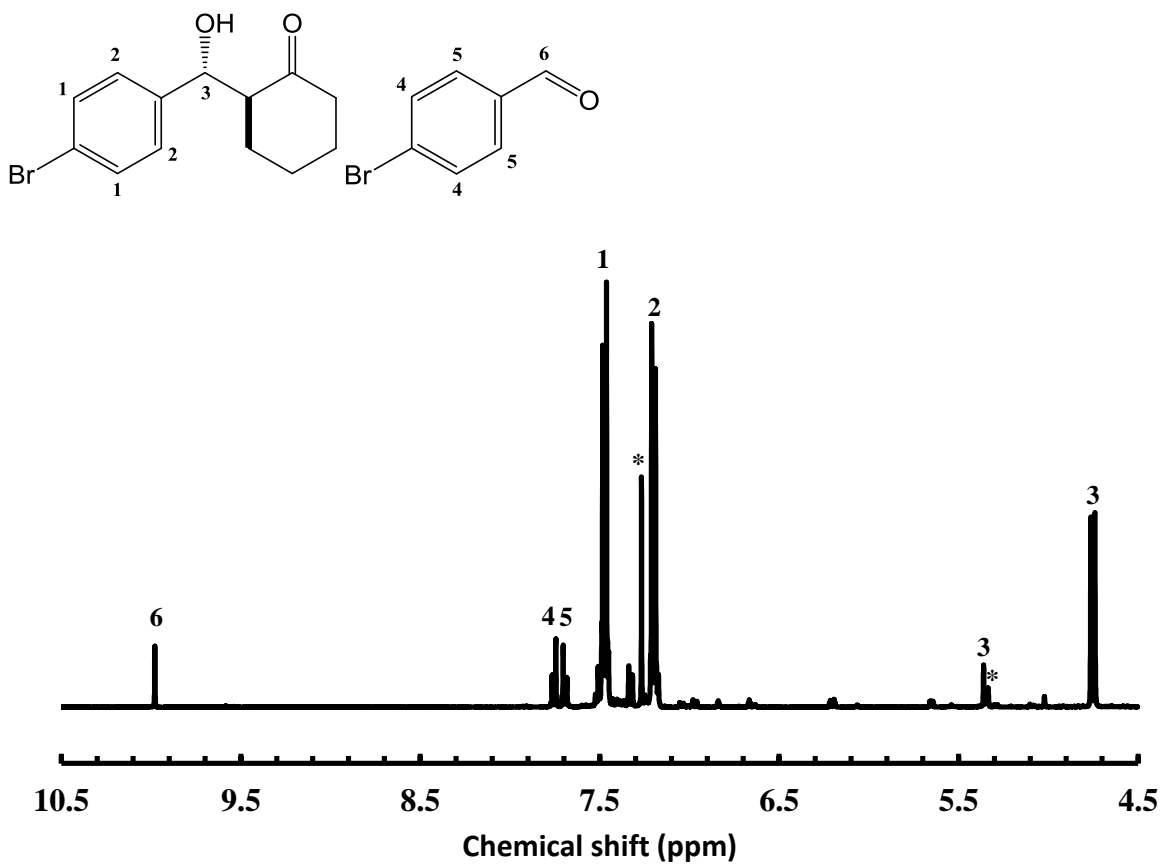

**Figure S11** <sup>1</sup>H NMR (400 MHz, CDCl<sub>3</sub>) data of the products from the Aldol reaction in Run 17 (Table 4) with de-protected P4 (DP4) as catalyst.

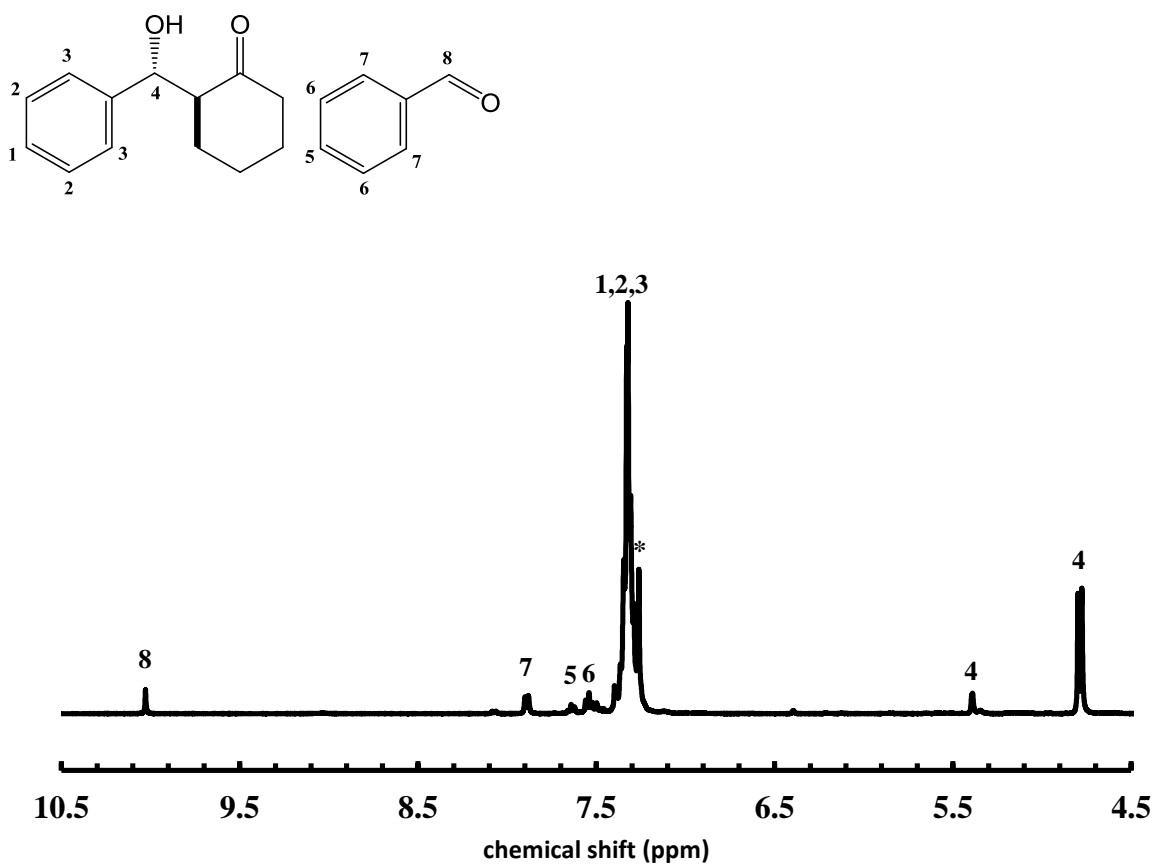

**Figure S12**  $^1\text{H}$  NMR (400 MHz,  $\text{CDCl}_3$ ) data of the products from the Aldol reaction in Run 18 (Table 4) with de-protected P4 (DP4) as catalyst.

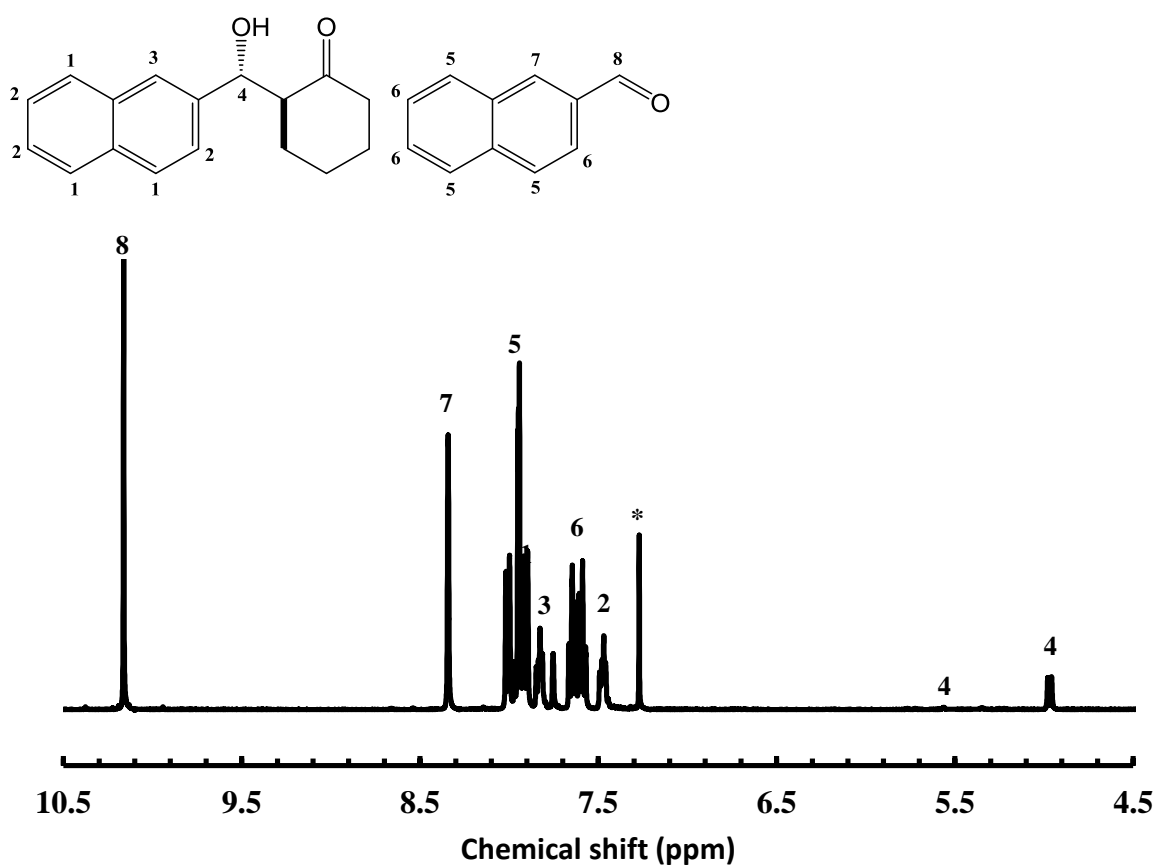

**Figure S13**  $^1\text{H}$  NMR (400 MHz,  $\text{CDCl}_3$ ) data of the products from the Aldol reaction in Run 19 (Table 4) with de-protected P4 (DP4) as catalyst.

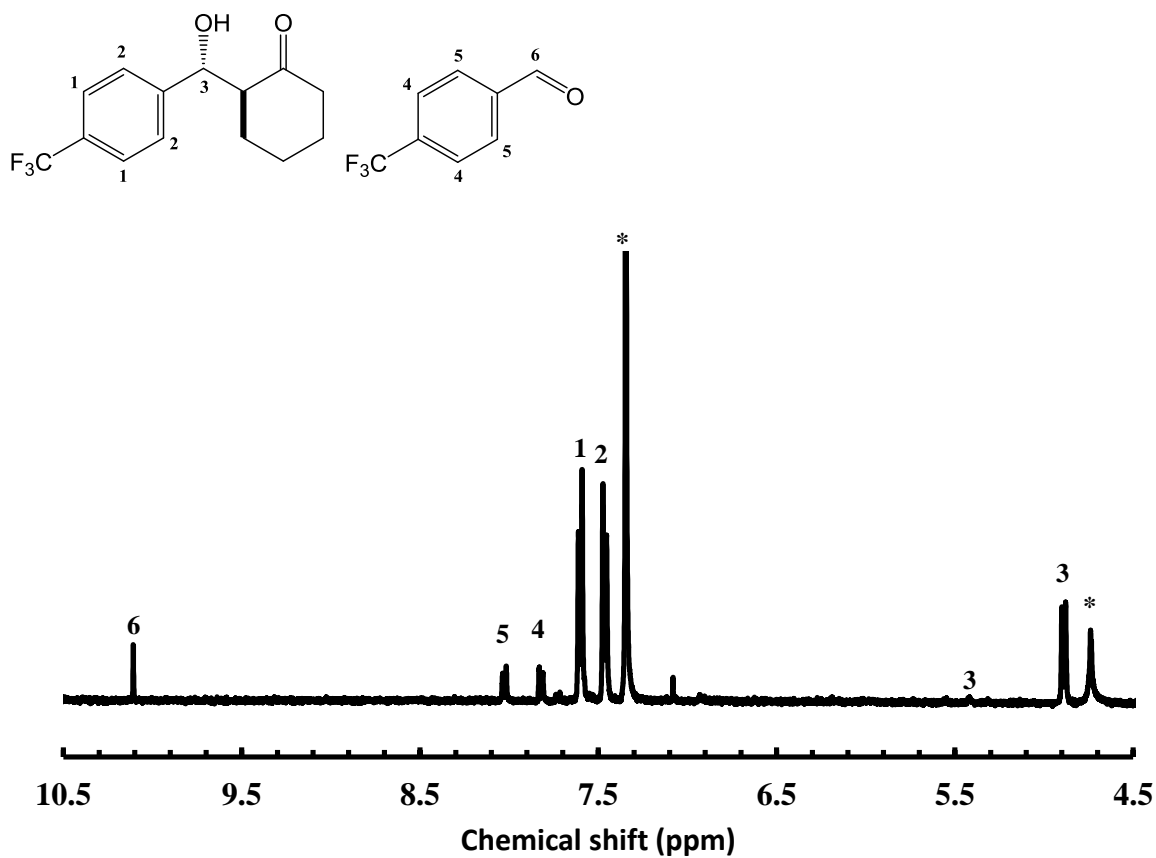

**Figure S14**  $^1\text{H}$  NMR (400 MHz,  $\text{CDCl}_3$ ) data of the products from the Aldol reaction in Run 20 (Table 4) with de-protected P4 (DP4) as catalyst.
